# Supplementary material for: A Bibliometric Analysis of Research on Selenium in Drinking Water during the 1990–2021 Period: Treatment Options for Selenium Removal
Source: MDPI journal article supplement (doi:10.3390/ijerph19105834), 2022-05-11
Supplement: s1 [file s1]

*Article*

# **A Bibliometric Analysis of Research on Selenium in Drinking Water during the 1990–2021 Period: Treatment Options for Selenium Removal**

**Ricardo Abejón**

Departamento de Ingeniería Química, Universidad de Santiago de Chile (USACH),  
Av. Libertador Bernardo O'Higgins 3363, Estación Central, Santiago 9170019,  
Chile; [ricardo.abejon@usach.cl](mailto:ricardo.abejon@usach.cl)

**Supplementary Material**

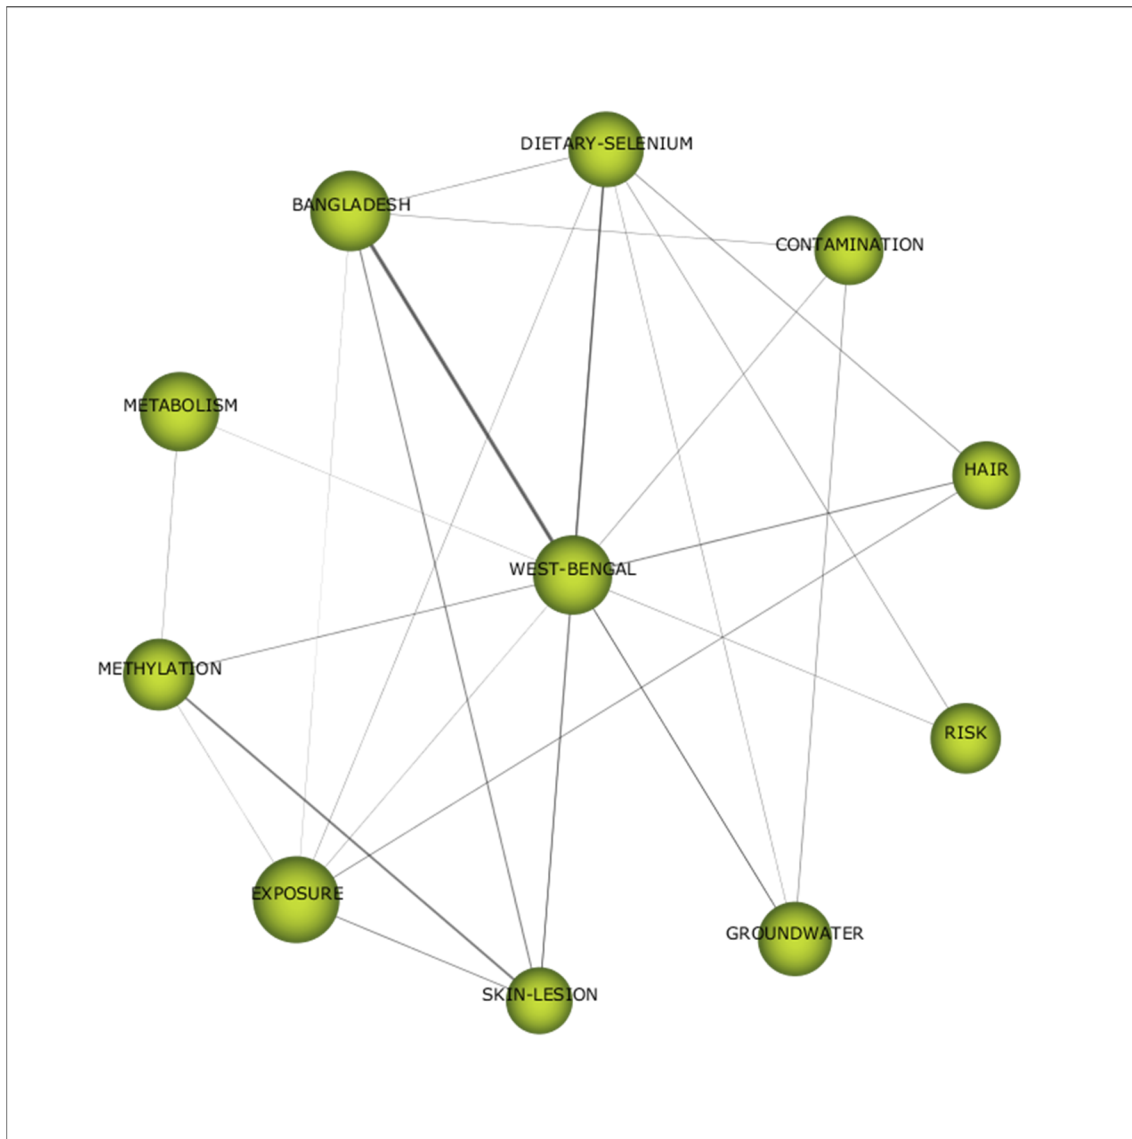

**Figure S1.** Structure of the cluster *West-Bengal* in the second subperiod (2002–2011).

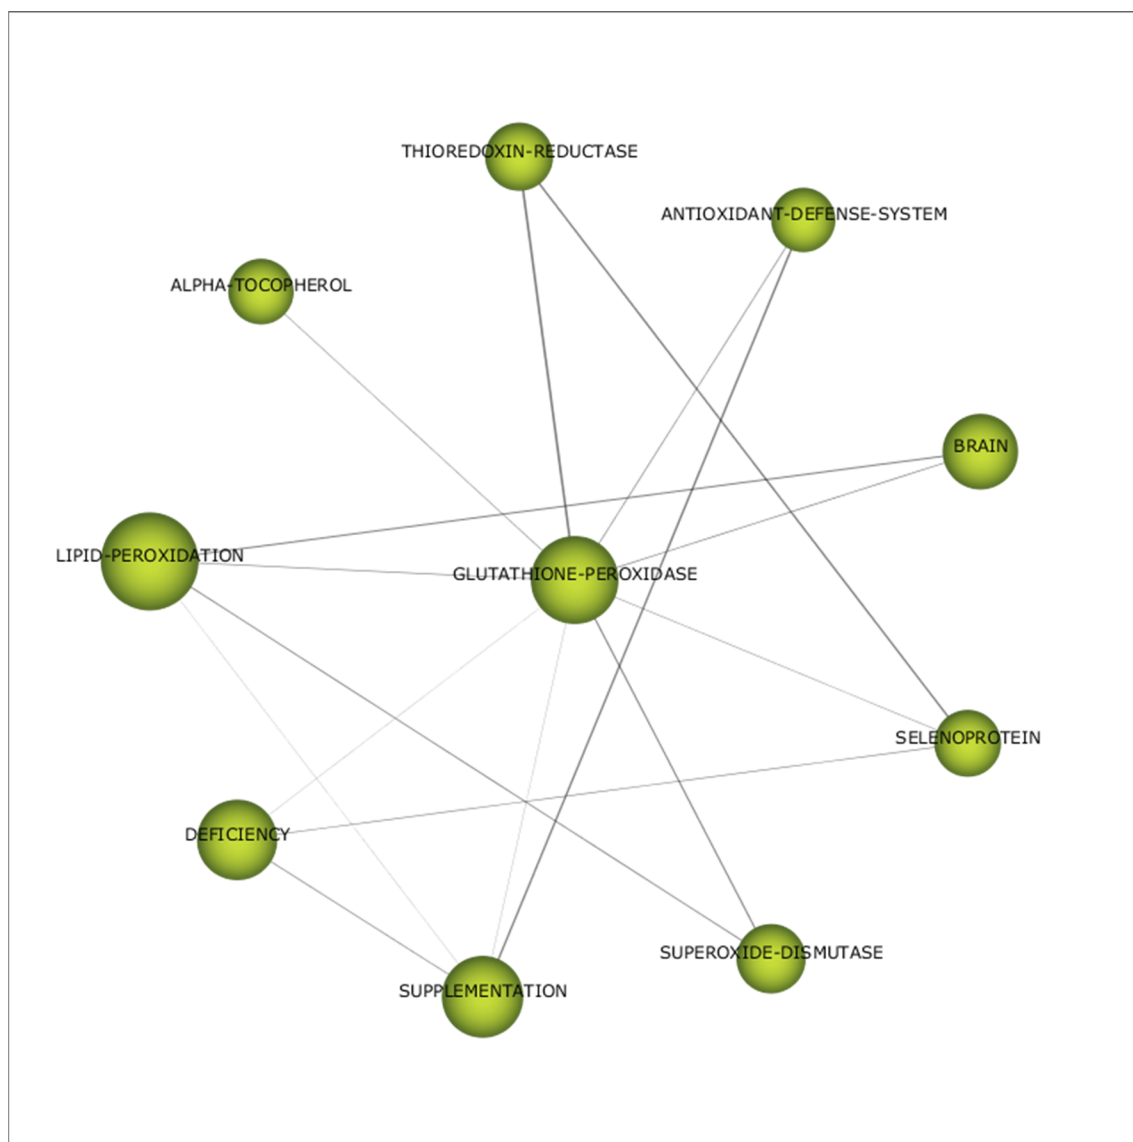

**Figure S2.** Structure of the cluster *Glutathione-Peroxidase* in the second subperiod (2002–2011).

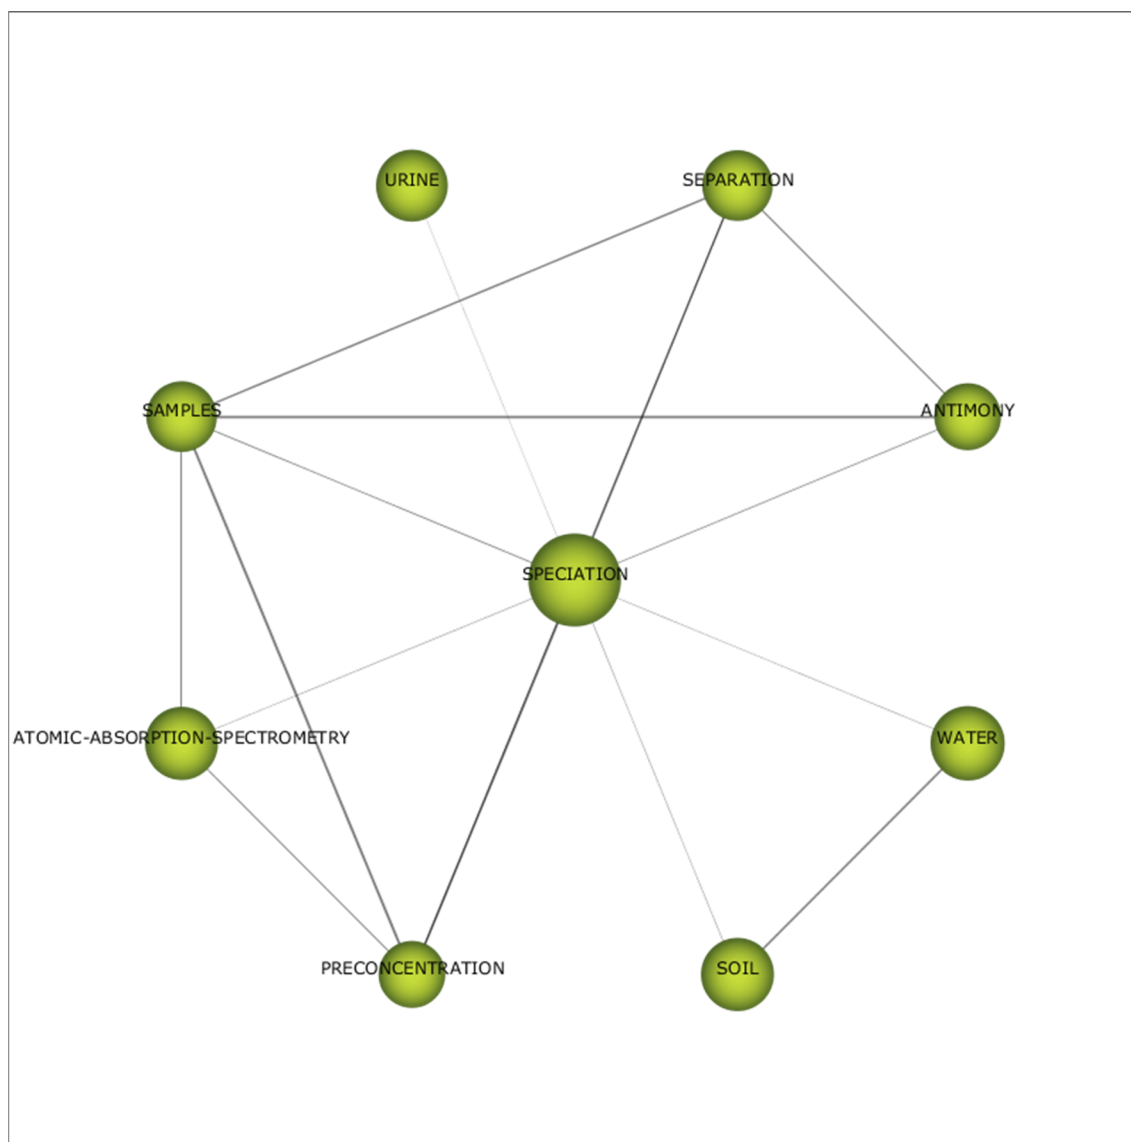

**Figure S3.** Structure of the cluster *Speciation* in the second subperiod (2002–2011).

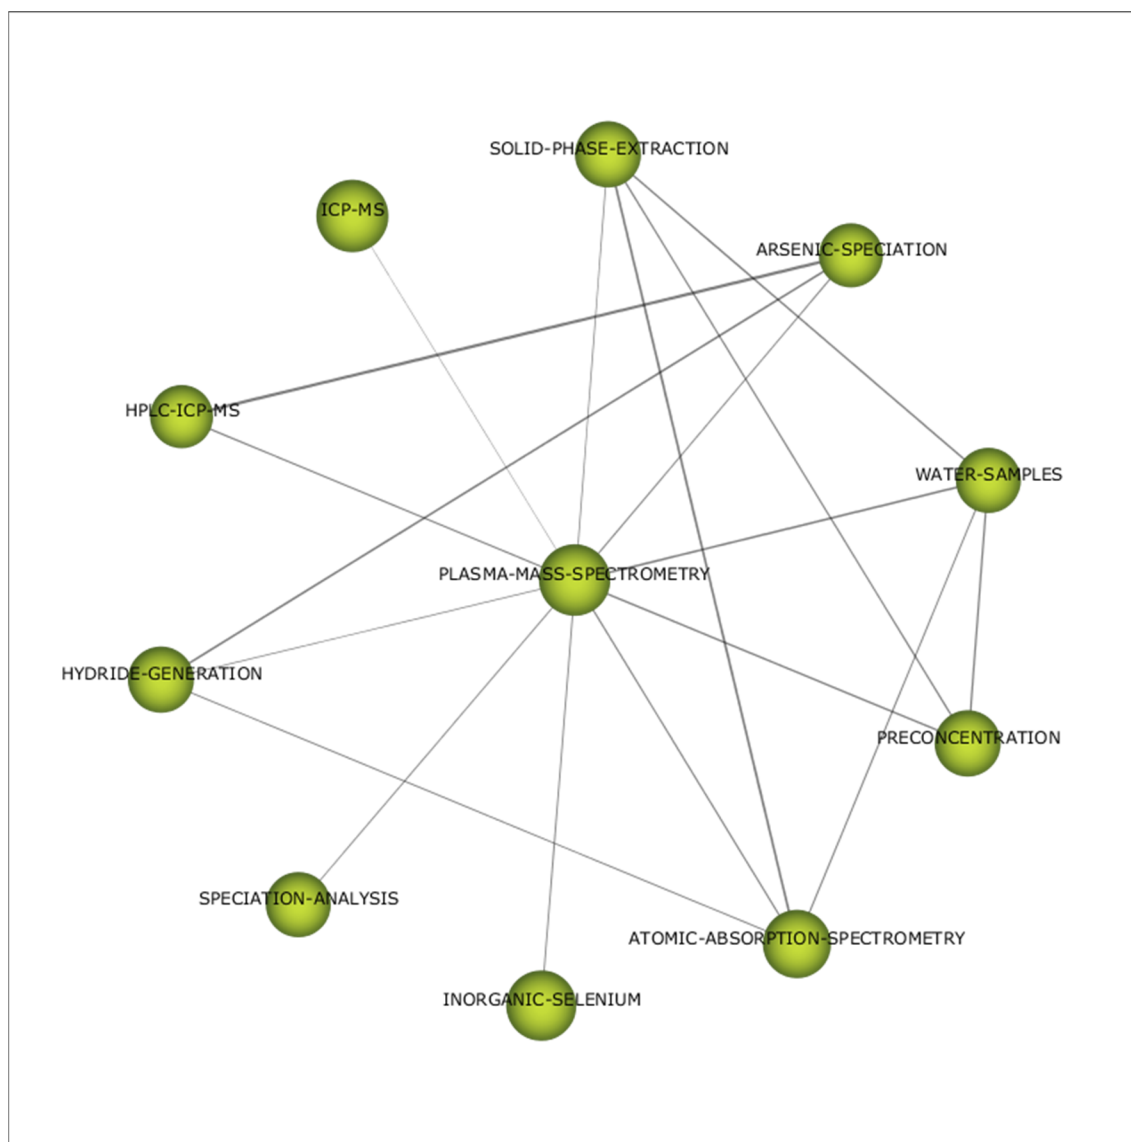

**Figure S4.** Structure of the cluster *Plasma-Mass-Spectrometry* in the third subperiod (2012–2019).

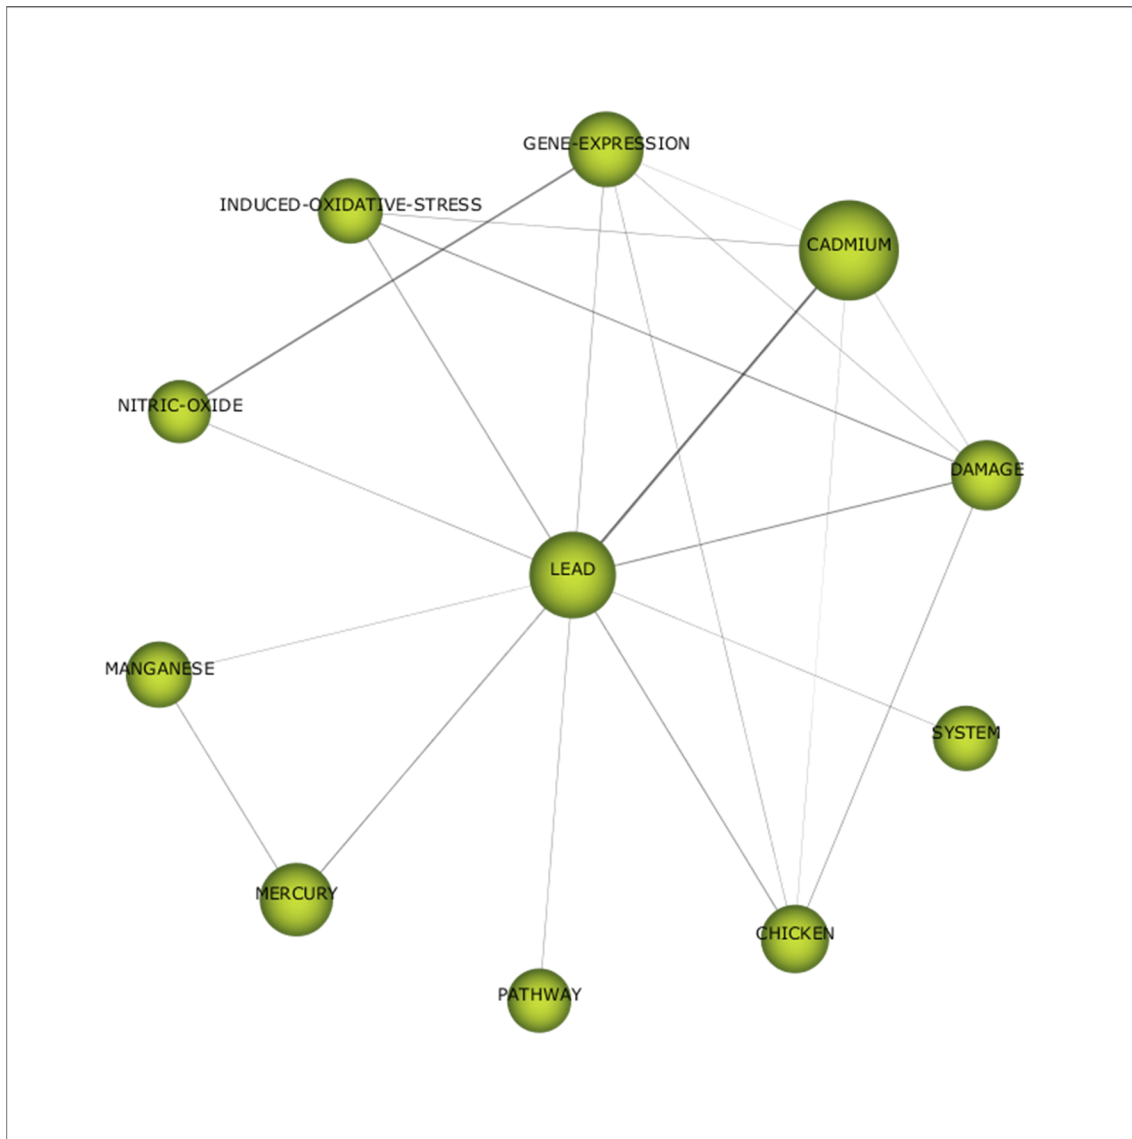

**Figure S5.** Structure of the cluster *Lead* in the third subperiod (2012–2019).

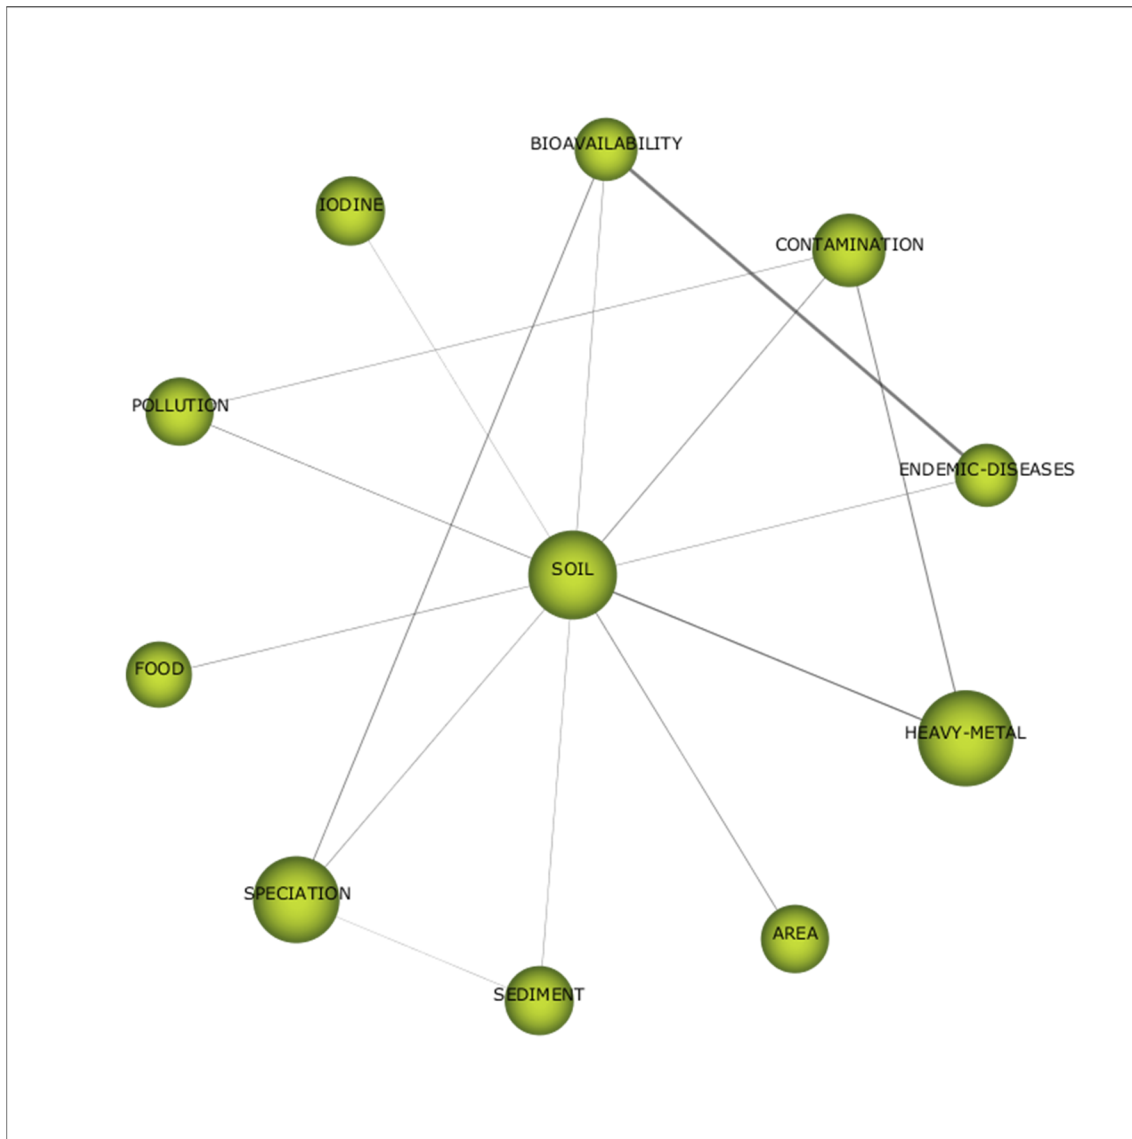

**Figure S6.** Structure of the cluster *Soil* in the third subperiod (2012–2019).

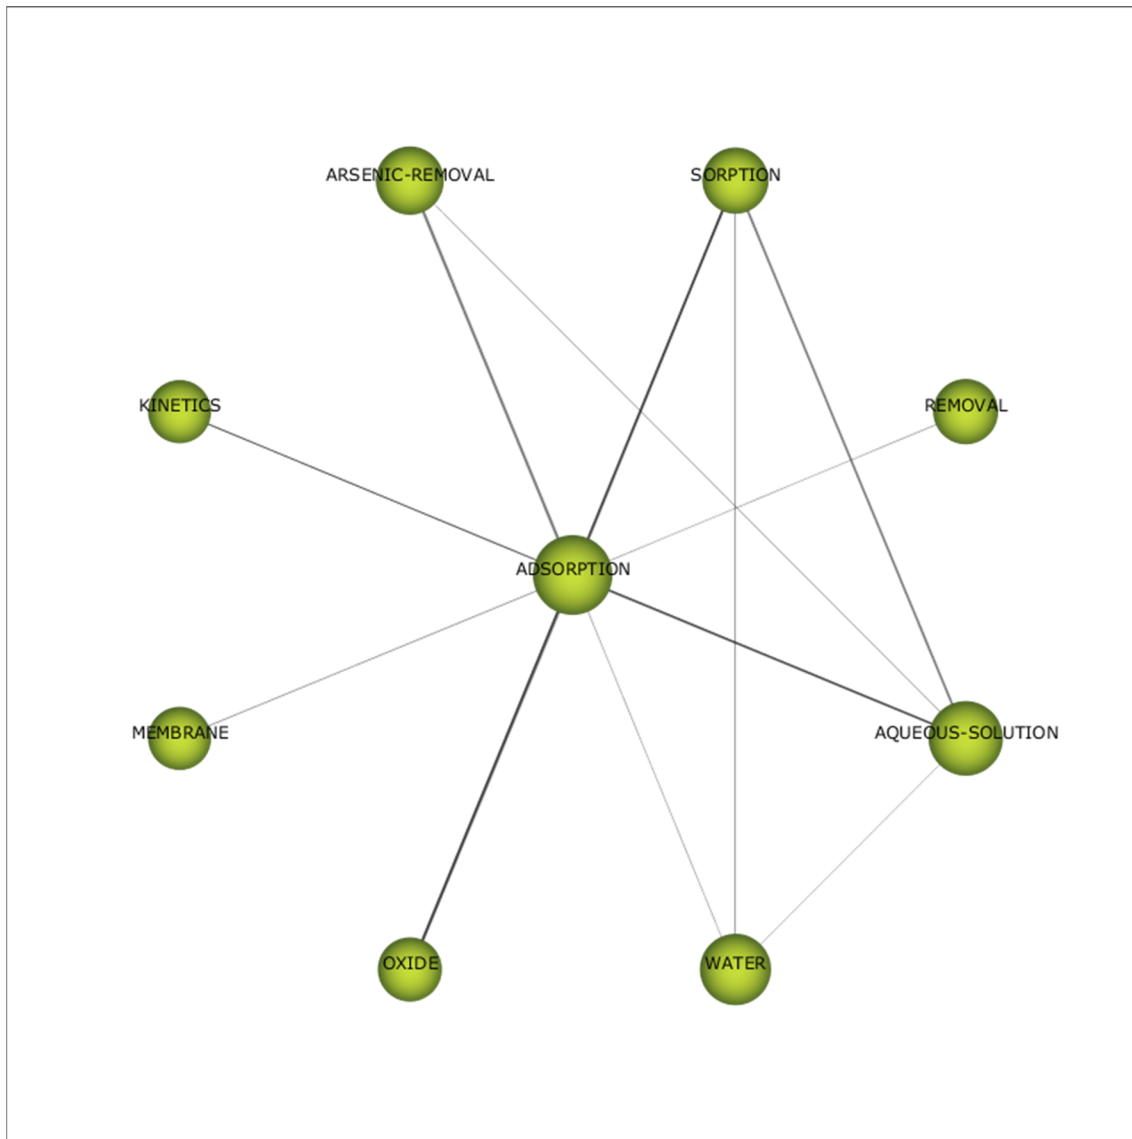

**Figure S7.** Structure of the cluster *Adsorption* in the third subperiod (2012–2019).



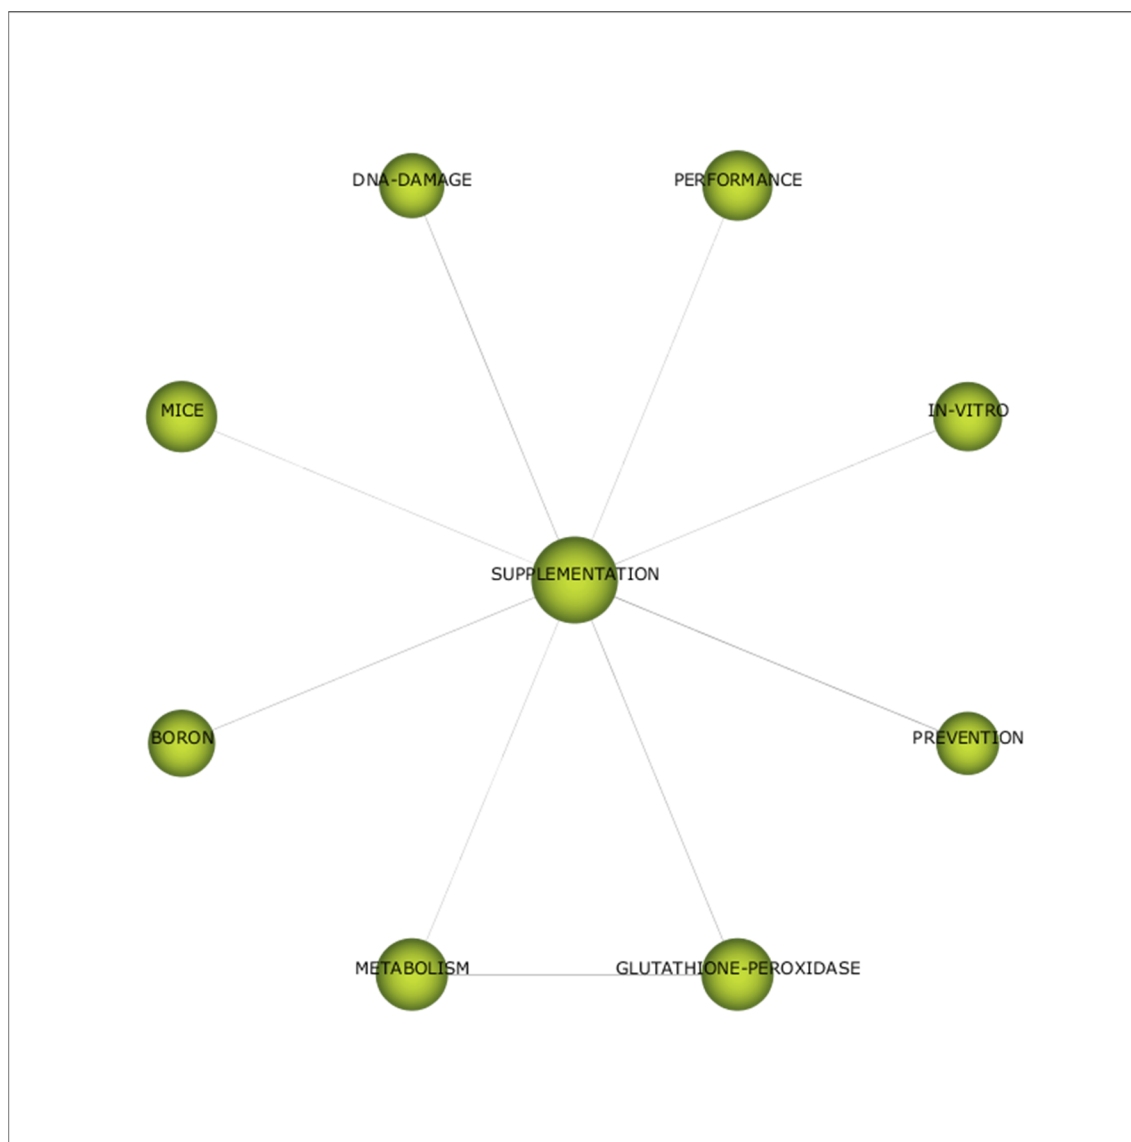

**Figure S8.** Structure of the cluster *Supplementation* in the third subperiod (2012–2019).

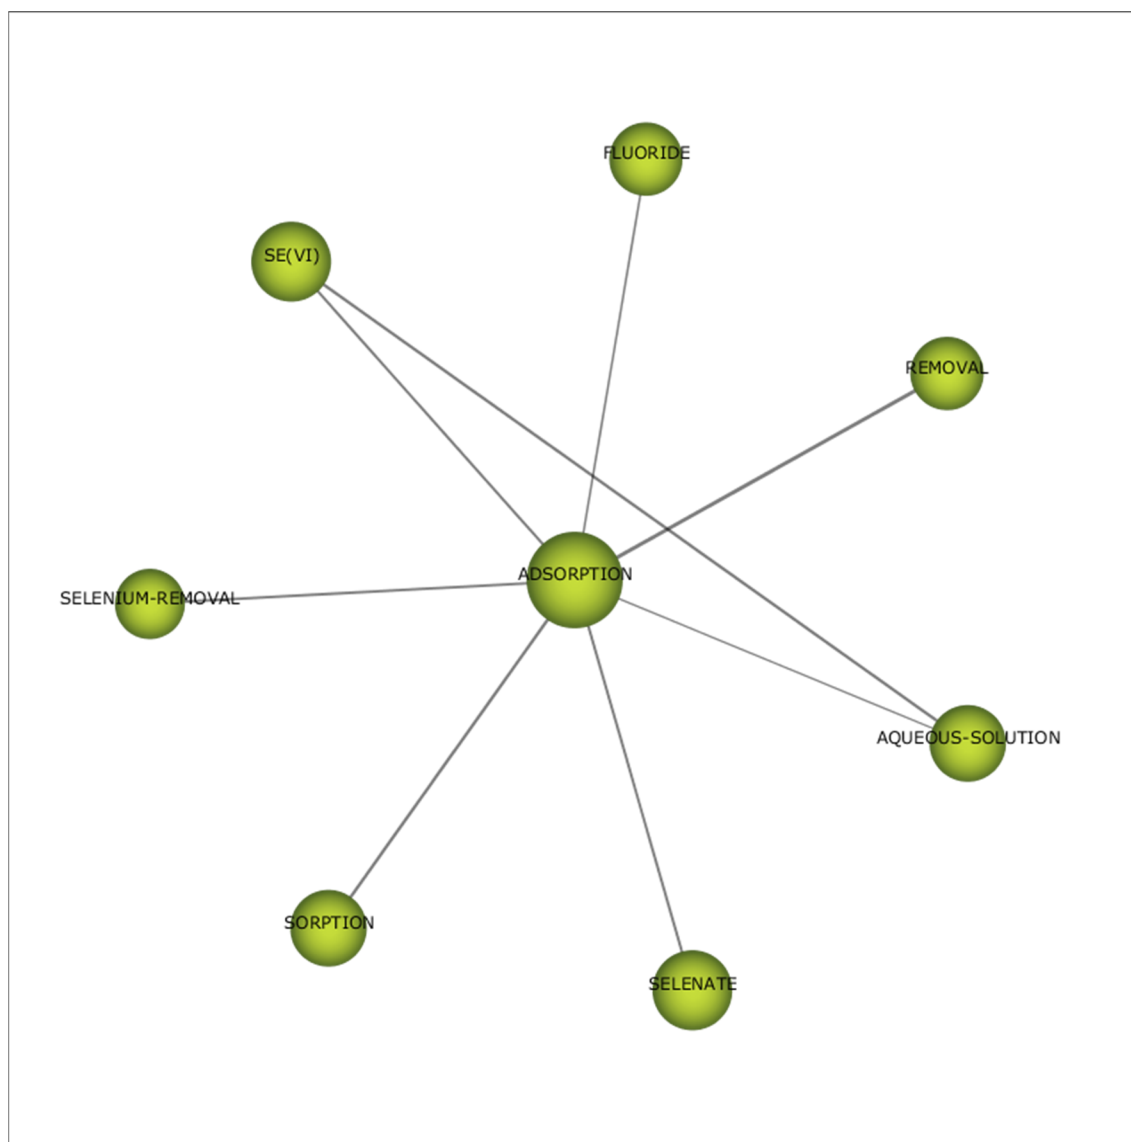

**Figure S9.** Structure of the cluster *Adsorption* in the fourth subperiod (2020–2021).
